# Supplementary material
Source: publisher site journal article supplement (https://www.spandidos-publications.com/2076/downloadSupplementary)

Figure S1. Expression of p120 in the spinal cord was significantly higher in the sham group than that in the naive group on postsurgical days 7 and 14. \* $P < 0.05$ , \*\* $P < 0.01$  vs. naive group.

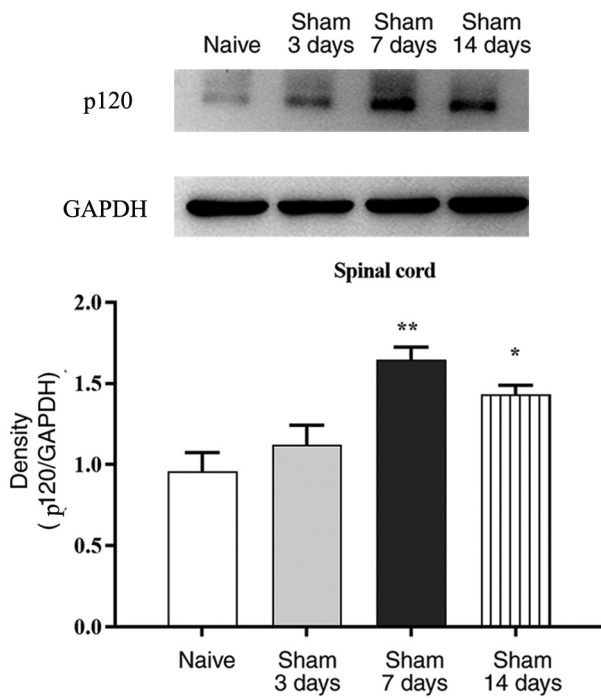

Figure S2. Expression of p120 in the DRG was significantly higher in the sham group than that in the naive group on postsurgical days 7 and 14 \* $P < 0.05$ , \*\* $P < 0.01$  vs. naive group. DRG, dorsal root ganglion.

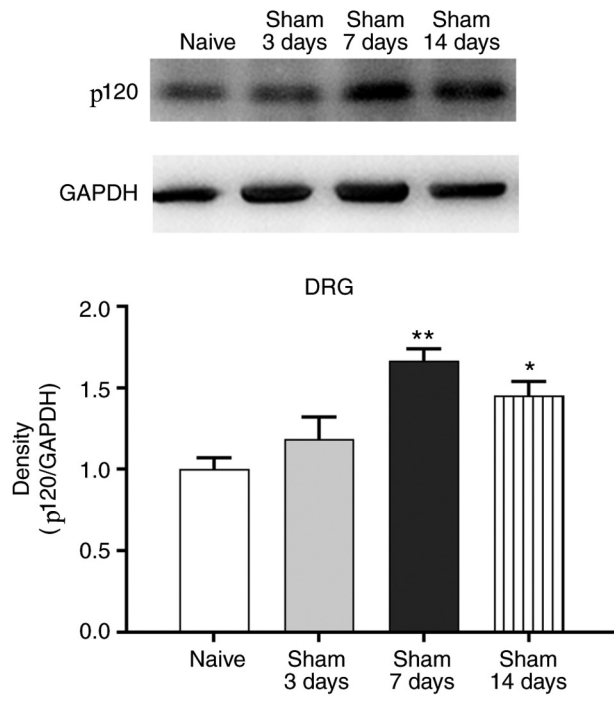

Supplement: Supplementary file 1 [file downloadSupplementary]
